# Level of Cognitive Functioning among Elderly Patients in Urban area of Bangladesh: A Cross-Sectional Study

Joynal Abedin Imran<sup>1\*</sup>, Pradip Kumar Saha<sup>1</sup>, Marzana Afrooz Ria<sup>1</sup>, Syeda Saika Sarwar<sup>1</sup>, Jannatul Ferdous Konok<sup>1</sup>

<sup>1</sup> Department of Physiotherapy, National Institute of Traumatology & Orthopaedic Rehabilitation (NITOR), Dhaka-1207, Bangladesh; Email: [dr.pradip1977@gmail.com](mailto:dr.pradip1977@gmail.com) (PKS); [marzana.afrooz@gmail.com](mailto:marzana.afrooz@gmail.com) (<https://orcid.org/0009-0005-7898-6839>) (MAR); [physiosaika.nitor@gmail.com](mailto:physiosaika.nitor@gmail.com) (SSS); [jfkonok1998@gmail.com](mailto:jfkonok1998@gmail.com) (JFK)

\* [4abedin@gmail.com](mailto:4abedin@gmail.com); <https://orcid.org/0009-0002-7237-7715>

## Abstract

Bangladesh is experiencing rapid urbanization and an increasing elderly population, particularly in urban areas. Cognitive decline is a common issue among elderly populations worldwide. This study aims to investigate the current state of cognitive decline among urban-dwelling older adults in Bangladesh to inform effective healthcare plans and programs. This cross-sectional study employed systematic random sampling among 150 participants at the outpatient department of NITOR in Dhaka, Bangladesh. Data were collected using a pretested structured standard questionnaire, and cognitive function was assessed with the Rowland Universal Dementia Assessment Scale (RUDAS). The study revealed a linear association between cognitive function and factors such as level of educational status, and history of eye sight problem. Conversely, age and diabetes showed an adverse correlation with cognitive function. Moreover, factors such as age, educational level and diabetes remained significant predictors of cognitive function in multivariate analysis. Cognitive impairment is significantly more common among the elderly in Bangladesh, with cognitive abilities being affected by a range of factors such as age, education level, diabetes, and vision issues.

## 1 Introduction

2 Cognitive decline is a prevalent issue among elderly populations globally [1], and Bangladesh is  
3 not exempt from this trend. The nation, which is undergoing swift urbanization, is witnessing a  
4 rise in its elderly population, especially in urban regions [2]. The swift urbanization and the  
5 aging population in Bangladesh have heightened concerns about the mental health and cognitive  
6 abilities of the elderly. This demographic change presents substantial challenges as well as  
7 opportunities for healthcare systems.

8 Cognitive impairment, which can lead to dementia, is a primary cause of disability among the  
9 elderly and a leading factor in dependency for older adults across low-, middle-, and high-

10 income countries [3]. This impairment is a significant public health issue as it greatly affects an  
11 individual's quality of life, independence, and daily functioning. Mild cognitive impairment  
12 (MCI) represents an intermediate stage between normal cognitive function and dementia [4].  
13 Research indicates that individuals with MCI are at a higher risk of developing dementia  
14 Currently, dementia impacts around 10 million people in the region, with its prevalence expected  
15 to double by 2030. Globally, approximately 35.6 million people suffer from dementia, a number  
16 projected to double to 65.7 million by 2030 and more than triple to 115.4 million by 2050.  
17 Dementia affects individuals worldwide, with over half (58%) residing in low- and middle-  
18 income countries; by 2050, this proportion is expected to exceed 70% In Bangladesh,  
19 Alzheimer's and dementia-related deaths accounted for 14,993, or 2.09% of all deaths, according  
20 to the latest WHO data published in 2020 [5].

21 Currently, the majority of Bangladesh's population is young; however, in the next 20 to 30 years,  
22 the proportion of older individuals is expected to increase significantly [6]. The urban elderly  
23 population in Bangladesh is growing rapidly, making it crucial to understand their cognitive  
24 functioning in order to develop effective healthcare strategies and interventions. There is a  
25 notable absence of government policies directly addressing the burden of cognitive impairment  
26 or dementia, largely due to the lack of reliable research that could inform policymakers, health  
27 professionals, and relevant authorities. Additionally, there is very limited research on cognitive  
28 impairment among the elderly in Bangladesh, which has not garnered sufficient attention from  
29 the research community. This study aims to address this gap by estimating the current prevalence  
30 of cognitive impairment and investigating its potential predictors among older adults in urban  
31 area of Bangladesh.

## 32 **Methodology**

33 The research employed an observational method featuring quantitative data within a cross-  
34 sectional study design. Data were collected from elderly patients visiting the outpatient  
35 department at National Institute of Traumatology & Orthopaedic Rehabilitation (NITOR) in  
36 Dhaka during 3<sup>rd</sup> March to 11<sup>th</sup> June 2024. NITOR was chosen as the sampling area for its  
37 convenience. Inclusion criteria was set age from 60 years and above and people of either gender.

38 The following formula was used to fix the sample size:

39 
$$n = \frac{Z^2 pq}{d^2}$$

40 Here, Prevalence level,  $p = 0.109$  or 10.9% [7]

41  $Z = 1.96$  for  $\alpha = 95\%$

42  $q = 1 - p = (1 - 0.109) = 0.891$

43 The desired sample size was 150. Informants were chosen using a systematic random sampling  
44 technique. The sampling interval was determined using the following formula:

$$K = \frac{N}{n}$$

$$K = \frac{476.03}{150}$$

$$K = 3.17$$

45 Here,  $N =$  Number of Population (173751 patients visited outpatient department, NITOR  
46 annually at 2022 [8] according to this data 476.03 patients visited daily),  $n =$  Number of sample  
47 size (150),  $K =$  Interval size

48 Following the sampling interval, every third elderly individual was approached and invited to  
49 participate in an interview. Prior to participation, each selected individual was required to  
50 provide written informed consent. In instances where a participant declined to participate, the  
51 next eligible individual, subsequent to every third person, was approached and invited to  
52 participate. The study was conducted in accordance with the declaration of Helsinki, and the  
53 protocol was approved by ethics committee of institutional review board of NITOR (Reference  
54 no. NITOR/PT/93/IRB/2024/4). Prior to commencing the study, participants were  
55 comprehensively apprised of the research objectives and methodologies. They were explicitly  
56 informed that their participation was entirely voluntary and that they could withdraw at any time.  
57 Furthermore, participants were assured that their data would be treated with the utmost  
58 confidentiality and anonymity, and that they would be fully informed of any potential risks and  
59 benefits associated with their involvement. Notably, no physical specimens were collected during  
60 the course of the study. Rather, researchers employed a standardized questionnaire to collect  
61 data, which is detailed below.

## 62 **Questionnaire**

63 Elderly patients were interviewed using a structured questionnaire to gather information on  
64 sociodemographic characteristics and physical health status. Cognitive function was assessed  
65 using the Rowland Universal Dementia Assessment Scale (RUDAS), a standard tool developed  
66 in a multicultural context in Australia [9]. This brief, six-item test is designed for quick and  
67 simple administration, is portable, and is considered culturally and educationally unbiased. The  
68 RUDAS evaluates body orientation, praxis, drawing, judgment, memory, and language, and also  
69 assesses executive function impairment. Scores were calculated according to the RUDAS scoring  
70 manual. According to Basic [9], a score below 23 points indicates possible dementia, prompting  
71 referral for further neuropsychological evaluation. Scores above 27 points are considered normal,  
72 while scores between 23 and 27 points may suggest a mild neurocognitive disorder (MNCD). In  
73 our study, the survey instrument was translated into Bengali using forward and backward  
74 translation and field-tested among 30 elderly participants. Any inconsistencies of data were  
75 identified according to necessity and corrected during field level. Regarding content validity  
76 after translation process for RUDAS scale, Cronbach's Alpha value was 0.9 and Cronbach's  
77 Alpha based on standardized items was 0.906 indicated that the instrument has an acceptable  
78 level of validity.

## 79 **Statistical Analysis**

80 The data analysis was performed using IBM SPSS version 26. Initially, descriptive statistical  
81 analysis was conducted to understand the participants' characteristics, including their RUDAS  
82 scores. Pearson's chi-square test or Fisher's exact test, students t-test was utilized to explore the  
83 association between cognitive function and sociodemographic factors, physical health, and  
84 comorbidities. Bivariate correlations between cognitive function and continuous factors were  
85 assessed using correlation coefficients and categorical factors were assess using t-test and  
86 ANOVA to identify significant relationships. For multivariate analysis, a linear regression model  
87 was developed with the RUDAS score as the dependent variable. Only covariates significantly  
88 associated with cognitive function in the bivariate analyses were included in the multivariate  
89 model. This approach controlled for potential confounding effects and identified the independent  
90 effects of each factor on cognitive function. Statistical significance was set at a P-value of less  
91 than 0.05. This comprehensive statistical analysis approach allowed for an in-depth examination

92 of the relationship between sociodemographic factors and cognitive function, controlling for  
93 confounding effects and identifying independent predictors of cognitive function in the elderly.

94 **Result**

95 **Sociodemographic characteristics**

96 In this study, 150 adults were enrolled, and none of the participants dropped out. The  
 97 participants' ages ranged from 60 to 85 years, with a mean age of  $67.41 \pm 6.31$  years (95%  
 98 confidence intervals = -1.76 to 2.08). The majority of participants were male (53.3%,  $n = 80$ ),  
 99 married (78.7%,  $n = 118$ ), and had primary education (28%,  $n = 42$ ) (Table 1). Regarding  
 100 monthly family income, 68.6% ( $n = 103$ ) were classified as low-income families. The mean age  
 101 of males was slightly higher than that of females. Additionally, there were gender differences in  
 102 marital status, education levels, and occupation.

103 **Table 1.** Sociodemographic characteristics of the participants ( $n = 150$ )

| <b>Characteristics</b>                       | <b>All participants (<math>n = 150</math>)</b> | <b>Male (<math>n = 80</math>)</b> | <b>Female (<math>n = 70</math>)</b> | <b>Chi-square</b>   | <b><i>P</i> - value</b> |
|----------------------------------------------|------------------------------------------------|-----------------------------------|-------------------------------------|---------------------|-------------------------|
| <b>Age (mean <math>\pm</math> <i>SD</i>)</b> | 67.41 $\pm$ 6.31                               | 67.50 $\pm$ 6.37                  | 67.31 $\pm$ 6.30                    | -                   | 0.874 <sup>a</sup>      |
| <b>Marital status (%)</b>                    |                                                |                                   |                                     | 43.096 <sup>b</sup> | <0.001                  |
| Married                                      | 118 (78.7)                                     | 74 (92.5)                         | 44 (62.9)                           |                     |                         |
| Unmarried                                    | 2 (1.3)                                        | 1 (1.3)                           | 1 (1.4)                             |                     |                         |
| Widow/Widower                                | 30 (20)                                        | 5 (6.3)                           | 25 (35.7)                           |                     |                         |
| <b>Education (%)</b>                         |                                                |                                   |                                     | 35.706 <sup>c</sup> | <0.001                  |
| No formal education                          | 17 (11.3)                                      | 4 (5)                             | 13 (18.6)                           |                     |                         |
| Primary education (grade 1-5)                | 42 (28)                                        | 11 (13.8)                         | 31 (44.3)                           |                     |                         |
| Secondary education (grade 6-10)             | 23 (15.3)                                      | 13 (16.3)                         | 10 (14.7)                           |                     |                         |
| Higher secondary (grade 11-12)               | 33 (22)                                        | 22 (27.5)                         | 11 (15.7)                           |                     |                         |
| Graduation                                   | 22 (14.7)                                      | 19 (23.8)                         | 3 (4.3)                             |                     |                         |
| Post-graduation                              | 13 (8.7)                                       | 11 (13.8)                         | 2 (2.9)                             |                     |                         |

|                                                  |           |           |           |                      |        |
|--------------------------------------------------|-----------|-----------|-----------|----------------------|--------|
| <b>Occupation (%)</b>                            |           |           |           | 148.568 <sup>b</sup> | <0.001 |
| Retired                                          | 32 (21.3) | 28 (35)   | 4 (5.7)   |                      |        |
| Farmer                                           | 11 (7.3)  | 11 (13.8) | 0         |                      |        |
| Businessman                                      | 22 (14.7) | 22 (27.5) | 0         |                      |        |
| Service holder                                   | 12 (8)    | 10 (12.5) | 2 (2.9)   |                      |        |
| Unemployed                                       | 5 (3.3)   | 5 (6.3)   | 0         |                      |        |
| Housewife                                        | 61 (40.7) | 0         | 61 (87.1) |                      |        |
| Others                                           | 7 (4.7)   | 4 (5)     | 3 (4.3)   |                      |        |
| <b>Family monthly expense (Taka)<sup>d</sup></b> |           |           |           | 3.886 <sup>c</sup>   | 0.274  |
| Below 20,000                                     | 29 (19.3) | 12 (15)   | 17 (24.3) |                      |        |
| 20,000 – 39,999                                  | 74 (49.3) | 39 (48.8) | 35 (50)   |                      |        |
| 40,000 – 59,999                                  | 35 (23.3) | 23 (28.7) | 12 (17.1) |                      |        |
| 60,000 and above                                 | 12 (8)    | 6 (7.5)   | 6 (8.6)   |                      |        |

<sup>a</sup>95% confidence intervals (CI) for mean difference = -1.76 to 2.08; <sup>b</sup>Fisher's exact correction test used for having 20% or more expected frequencies less than 5; <sup>c</sup>Pearson Chi-square; <sup>d</sup>1 US dollar = 109.39 Taka in February, 2024.

#### 104 **Differences in characteristics of physical health and comorbidities related factors**

105 Table 2 presents characteristics related to the physical health, smoking habits, sleep patterns,  
 106 comorbidities, and cognitive function of the elderly population. The participants had a normal  
 107 BMI, with a mean  $\pm$  SD of  $23.99 \pm 4.06$ . The obesity rate was slightly higher in males (7.5%)  
 108 compared to females (7.1%). Due to social norms in Bangladesh, none of the female participants  
 109 smoked, while 15% of the male participants were current or former smokers. Most elderly  
 110 individuals (54.7%) reported getting 6 to 7 hours of sleep per day. Diabetes, stroke, and cardiac  
 111 disease were more prevalent among males, whereas sleeping difficulties, vision problems,  
 112 arthritis, and asthma were more common among females.

#### 113 *RUDAS scores*

114 The study participants (n = 150) generally exhibited poor cognitive function, with a mean  $\pm$  SD  
 115 score of  $21.62 \pm 4.80$ . Females had lower cognitive function scores compared to males ( $21.16 \pm$   
 116  $5.25$  vs.  $22.03 \pm 4.36$ ). When categorizing cognitive function, the majority of participants

117 (53.3%) were classified as having poor cognitive function (Dementia), over a quarter had mild  
 118 neurocognitive disorder (MNCN), and only about 8% had normal cognitive function.

119 **Table 2.** Characteristics of physical health, sleep hours, comorbidities and RUDAS score of the  
 120 participants (n = 150)

| Characteristics                                  | All participants (n = 150) | Male (n = 80) | Female (n = 70) | Chi-square          | P-value |
|--------------------------------------------------|----------------------------|---------------|-----------------|---------------------|---------|
| <b>Body mass index, mean ± SD</b>                | 23.99 ± 4.06               | 24.50 ± 4.25  | 23.41 ± 3.78    |                     | 0.102   |
| Underweight                                      | 3 (2)                      | 0             | 3 (4.3)         | 3.611 <sup>a</sup>  | 0.307   |
| Normal                                           | 106 (70.7)                 | 56 (70)       | 50 (71.4)       |                     |         |
| Overweight                                       | 30 (20)                    | 18 (22.5)     | 12 (17.1)       |                     |         |
| Obese                                            | 11 (7.3)                   | 6 (7.5)       | 5 (7.1)         |                     |         |
| <b>Smoking status (%)</b>                        |                            |               |                 | 61.765 <sup>b</sup> | <0.001  |
| Current smoker                                   | 12 (8)                     | 12 (15)       | 0               |                     |         |
| Former Smoker                                    | 36 (24)                    | 36 (45)       | 0               |                     |         |
| Never smoked                                     | 102 (68)                   | 32 (40)       | 70 (100)        |                     |         |
| <b>Water intake per day (glasses), mean ± SD</b> | 7.50 ± 1.84                | 7.89 ± 1.96   | 7.06 ± 1.60     | -                   | 0.005   |
| <b>Sleep duration per day (%)</b>                |                            |               |                 | 3.329 <sup>b</sup>  | 0.189   |
| 3-5 hours                                        | 24 (16)                    | 9 (11.3)      | 15 (21.4)       |                     |         |
| 6-7 hours                                        | 82 (54.7)                  | 48 (60)       | 34 (48.6)       |                     |         |
| 8-9 hours                                        | 44 (29.3)                  | 23 (28.7)     | 21 (30)         |                     |         |
| <b>Diabetes (%)</b>                              |                            |               |                 | 1.467 <sup>b</sup>  | 0.250   |
| Yes                                              | 65 (43.3)                  | 31 (38.8)     | 34 (48.6)       |                     |         |
| No                                               | 85 (56.7)                  | 49 (61.3)     | 36 (51.4)       |                     |         |
| <b>Stroke (%)</b>                                |                            |               |                 | 3.022 <sup>b</sup>  | 0.082   |
| Yes                                              | 33 (22)                    | 22 (27.5)     | 11 (15.7)       |                     |         |
| No                                               | 117 (78)                   | 58 (72.5)     | 59 (84.3)       |                     |         |
| <b>Cardiac disease (%)</b>                       |                            |               |                 | 2.406 <sup>b</sup>  | 0.121   |



|                                               |              |              |              |                    |       |
|-----------------------------------------------|--------------|--------------|--------------|--------------------|-------|
| Yes                                           | 57 (38)      | 35 (43.8)    | 22 (31.4)    |                    |       |
| No                                            | 93 (62)      | 45 (56.3)    | 48 (68.6)    |                    |       |
| <b>Eye sight problem (%)</b>                  |              |              |              | 6.780 <sup>b</sup> | <0.01 |
| Yes                                           | 95 (63.3)    | 43 (53.8)    | 52 (74.3)    |                    |       |
| No                                            | 55 (36.7)    | 37 (46.3)    | 18 (25.7)    |                    |       |
| <b>Arthritis (%)</b>                          |              |              |              | 5.788 <sup>b</sup> | <0.05 |
| Yes                                           | 108 (72)     | 51 (63.7)    | 57 (81.4)    |                    |       |
| No                                            | 42 (28)      | 29 (36.3)    | 13 (18.6)    |                    |       |
| <b>Pulmonary disease (%)</b>                  |              |              |              | 0.010 <sup>b</sup> | 0.920 |
| Yes                                           | 38 (25.3)    | 20 (25)      | 18 (25.7)    |                    |       |
| No                                            | 112 (74.7)   | 60 (75)      | 52 (74.3)    |                    |       |
| <b>RUDAS, mean ± SD</b>                       | 21.62 ± 4.80 | 22.03 ± 4.36 | 21.16 ± 5.25 |                    | 0.271 |
| <b>RUDAS score categories</b>                 |              |              |              | 0.489 <sup>b</sup> | 0.783 |
| Dementia (less than 23)                       | 80 (53.3)    | 41 (51.2)    | 39 (55.7)    |                    |       |
| Mild Neurocognitive Disorder (MNCN) (23 – 27) | 58 (38.7)    | 33 (41.3)    | 25 (35.7)    |                    |       |
| Normal (Above 27)                             | 12 (8)       | 6 (7.5)      | 6 (8.6)      |                    |       |

<sup>a</sup>Fisher's exact correction test used for having 20% or more expected frequencies less than 5;

<sup>b</sup>Pearson Chi-Square.

121

## 122 **Distribution of elderly people by Cognitive function score (RUDAS) categories**

123 Among the 150 participants, the highest cognitive function score was 29 and the lowest was 8,  
 124 out of a possible 30 points. The median cognitive function score was 22, with the 25th and 75th  
 125 percentiles being 19 and 25, respectively. A large portion of the participants (53.3%) were  
 126 identified as having dementia, while only 8% were observed to have normal cognitive function  
 127 (Figure 1).

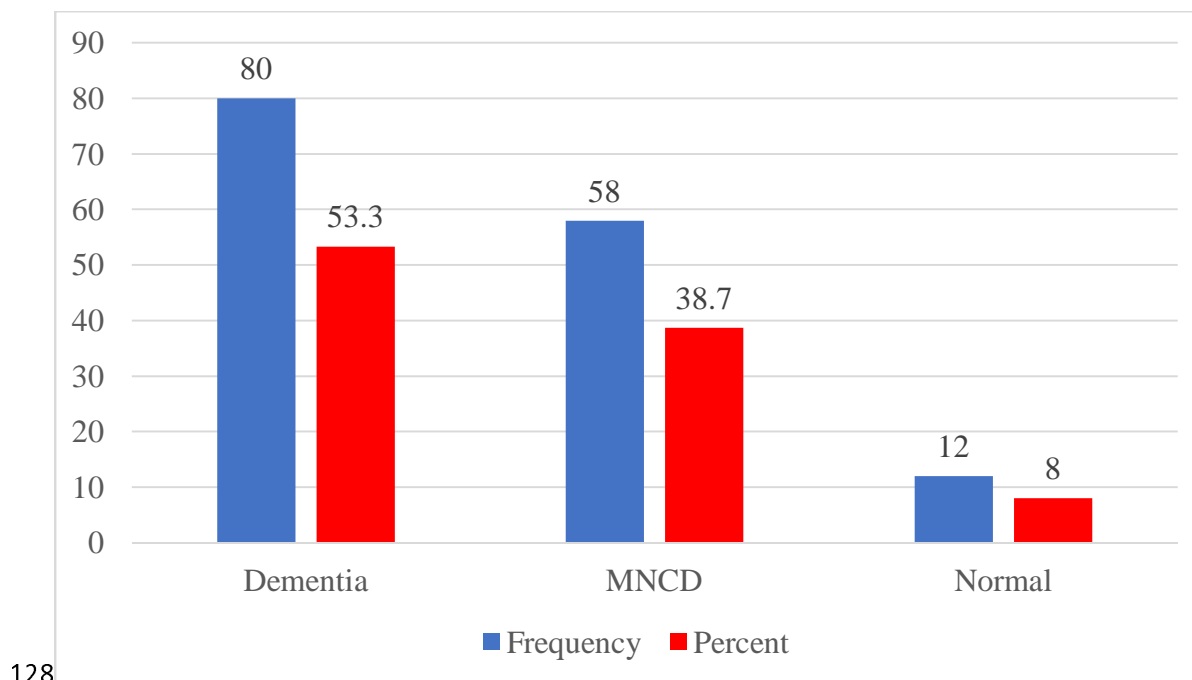

128

129

**Figure 1.** Distribution of the participants by RUDAS scores (n = 150)

130

### 131 **Correlation between Sociodemographic Factors and Cognitive function (RUDAS) Scores**

132 A bivariate correlation test (Table 3) revealed that cognitive function was inversely correlated  
133 with age ( $r = -0.451$ ,  $P = 0.000$ ), indicating poorer cognitive function with increasing age among  
134 the elderly population.

135 **Table 3.** Correlation matrix between RUDAS scores with sociodemographic and comorbidities  
136 factors in elderly population (n = 150)

|                        |          | Age | Monthly family expense | BMI   | Water intake | Sleep duration | RUDAS    |
|------------------------|----------|-----|------------------------|-------|--------------|----------------|----------|
| Age                    | <i>r</i> | 1   | 0.073                  | 0.078 | -0.033       | 0.085          | -0.451** |
|                        | <i>P</i> |     | 0.375                  | 0.341 | 0.690        | 0.303          | 0.000    |
| Monthly family expense | <i>r</i> |     | 1                      | 0.094 | -0.049       | -0.062         | 0.109    |
|                        | <i>P</i> |     |                        | 0.251 | 0.548        | 0.453          | 0.184    |
| BMI                    | <i>r</i> |     |                        | 1     | -0.080       | 0.163*         | 0.138    |
|                        | <i>P</i> |     |                        |       | 0.331        | 0.047          | 0.092    |
| Water intake           | <i>r</i> |     |                        |       | 1            | 0.020          | 0.104    |
|                        | <i>P</i> |     |                        |       |              | 0.806          | 0.207    |
| Sleep duration         | <i>r</i> |     |                        |       |              | 1              | 0.039    |
|                        | <i>P</i> |     |                        |       |              |                | 0.637    |

\*\*Correlation is significant at the 0.01 level (2-tailed); \*Correlation is significant at the 0.05 level (2-tailed)

137

138 A bivariate t-test and ANOVA test that revealed Education ( $P = 0.009$ ), Diabetes ( $P = 0.038$ ), and  
 139 Eye Sight Problems ( $P = 0.009$ ) are significantly associated with RUDAS Scores implying they  
 140 were significant predictors understanding cognitive performance. (Table 4)

141 **Table 4.** Association between RUDAS scores with sociodemographic and comorbidities factors  
 142 in elderly population ( $n = 150$ )

| Variables             | RUDAS Score |      | <i>P</i> -value    |
|-----------------------|-------------|------|--------------------|
|                       | Mean        | SD   |                    |
| <b>Gender</b>         |             |      | 0.271 <sup>a</sup> |
| Male                  | 22.03       | 4.36 |                    |
| Female                | 21.16       | 5.25 |                    |
| <b>Marital Status</b> |             |      | 0.528 <sup>b</sup> |
| Married               | 21.85       | 4.58 |                    |
| Unmarried             | 21.50       | 6.36 |                    |
| Widow/widower         | 20.73       | 5.59 |                    |
| <b>Education</b>      |             |      | 0.009 <sup>a</sup> |

|                          |       |      |                    |
|--------------------------|-------|------|--------------------|
| Graduation & below       | 21.34 | 4.81 |                    |
| Post graduation          | 24.62 | 3.66 |                    |
| <b>Occupation</b>        |       |      | 0.347 <sup>b</sup> |
| Retired                  | 22.03 | 4.43 |                    |
| Farmer                   | 20.36 | 5.03 |                    |
| Businessman              | 22.23 | 3.68 |                    |
| Service holder           | 24.08 | 3.50 |                    |
| Unemployed               | 19.20 | 5.81 |                    |
| Housewife                | 21.05 | 5.36 |                    |
| Others                   | 22.29 | 4.96 |                    |
| <b>Smoking status</b>    |       |      | 0.636 <sup>b</sup> |
| Current smoker           | 21.83 | 3.79 |                    |
| Former smoker            | 22.25 | 4.14 |                    |
| Never smoked             | 21.37 | 5.13 |                    |
| <b>Diabetes</b>          |       |      | 0.038 <sup>a</sup> |
| Present                  | 20.68 | 5.04 |                    |
| Absent                   | 22.34 | 4.52 |                    |
| <b>Stroke</b>            |       |      | 0.446 <sup>a</sup> |
| Present                  | 20.97 | 5.74 |                    |
| Absent                   | 21.80 | 4.52 |                    |
| <b>Cardiac disease</b>   |       |      | 0.606 <sup>a</sup> |
| Present                  | 21.37 | 4.44 |                    |
| Absent                   | 21.77 | 5.04 |                    |
| <b>Eye sight problem</b> |       |      | 0.009 <sup>a</sup> |
| Present                  | 20.84 | 5.16 |                    |
| Absent                   | 22.96 | 3.81 |                    |
| <b>Arthritis</b>         |       |      | 0.292 <sup>a</sup> |
| Present                  | 21.37 | 4.91 |                    |
| Absent                   | 22.26 | 4.51 |                    |
| <b>Pulmonary disease</b> |       |      | 0.919 <sup>a</sup> |
| Present                  | 21.68 | 4.32 |                    |
| Absent                   | 21.60 | 4.98 |                    |

<sup>a</sup>t-test; <sup>b</sup>ANOVA

143

#### 144 **Linear Regression Analysis to Predict Cognitive Function**

145 The variables that were statistically significant in the bivariate analysis were included in the  
 146 regression model. The dependent variable was the continuous cognitive function (RUDAS)  
 147 score. The selected independent variables were: age, educational status (0 = graduation & below,  
 148 1 = post-graduation), diabetes (0 = yes, 1 = no), and eyesight problems (0 = yes, 1 = no). Before  
 149 developing the model multicollinearity and residual assumptions were analyzed. No

150 multicollinearity was observed among the independent variables. The standard residual value  
151 was minimum -2.896 and maximum 2.357 indicating no outliers in the dependent variable. The  
152 Durbin-Watson test value was 1.276 indicating data points were independent. To analyze the  
153 normality of the residuals and constant variance; histogram, normal probability (P-P) plot and a  
154 scatter plot of the residuals were produced. The distribution of the residuals was seen normal in  
155 the histogram and P-P plot. The variance (homoscedasticity) was constant in the scatter plot.

156 Table 5 data shows that the statistically significant predictors of cognitive function including: age  
157 ( $P = <0.001$ ), educational status ( $P = 0.046$ ), history of diabetes ( $P = 0.005$ ). Eye sight problem  
158 was excluded from the model because of  $P > 0.05$ .

159 The predicted model for the data was as follows:

160 Cognitive function (RUDAS) = 41.96 – 0.33 (age) + 2.4 (educational status) + 1.95 (history of  
161 diabetes)

162 **Table 5.** Factors predicting cognitive function in elderly people (n= 150)

| Variable           | $\beta$ - coefficient | SE   | Standardized $\beta$ -<br>coefficient | P-value | 95% CI for $\beta$ |
|--------------------|-----------------------|------|---------------------------------------|---------|--------------------|
| Constant           | 41.96                 | 3.74 |                                       | <0.001  |                    |
| Age                | -0.33                 | 0.06 | -0.43                                 | <0.001  | -0.43 to -0.22     |
| Educational status | 2.4                   | 1.20 | 0.14                                  | 0.046   | 0.05 to 4.79       |
| Diabetes           | 1.95                  | 0.68 | 0.20                                  | 0.005   | 0.60 to 3.30       |

Variables excluded from the model: Eye sight problem ( $P = 0.058$ )

163

## 164 Discussion

165 Findings based on the RUDAS scale in this study indicate that a significant number of  
166 participants aged 60 years and older exhibited mild neurocognitive impairment and dementia.  
167 Similar results have been reported in several studies, which found that cognitive performance  
168 significantly decreases with increasing age [10-12]. Additionally, our study found that females  
169 had more impaired cognitive function than males, a trend also noted by Beam et al. and Oishee et  
170 al. [11,13].

171 In this study, educational qualifications of the elderly showed a significant relationship with  
172 cognitive function. Higher educational status was associated with better cognitive function in the  
173 elderly. Research supports that higher education levels correlate with improved cognitive health  
174 and can serve as a protective factor against cognitive decline [14,15]. Additionally, the level of  
175 education moderates the relationship between depressive symptoms and cognitive functioning,  
176 with lower education levels being linked to poor cognitive outcomes [16].

177 This study found a higher prevalence of diabetes among female participants, which was  
178 significantly associated with cognitive decline. Diabetic elderly participants had lower cognitive  
179 function compared to non-diabetic participants. Elderly individuals with diabetes are at increased  
180 risk for cognitive dysfunction and dementia, affecting their overall cognitive functioning.  
181 Research supports that diabetes, whether diagnosed or undiagnosed, is linked to poor cognitive  
182 function, particularly in the elderly [17,18]. Cognitive impairment among those aged 65 and  
183 older, as measured by the Mini-Mental State Examination (MMSE), was significantly higher  
184 among diabetic patients [19].

185 Although this study had found no significant relationship between eyesight problems and  
186 cognitive function but some study supports a strong association between cognitive function and  
187 visual ability in the elderly. Studies have shown that individuals with mild cognitive impairment  
188 (MCI) have lower functional visual acuity compared to those with normal cognition [20], and  
189 worsening vision is linked to declining cognitive function over time [21]. Improved cognitive  
190 function is associated with better best-corrected visual acuity, highlighting the importance of  
191 addressing visual impairments to mitigate cognitive decline in older adults [22].

## 192 **Limitations**

193 This study was conducted in a specific area of Bangladesh, chosen purposively due to the  
194 cooperation of local authorities. To address these limitations, moving forward, future studies  
195 should explore additional factors that may influence cognitive function and incorporate  
196 longitudinal designs to better understand the trajectory of cognitive decline over time as this  
197 study provided a snapshot of an elderly population at a specific moment, making it difficult to  
198 assess temporal relationships or trends.

## 199 **Conclusions**

200 Efforts to develop tailored interventions and policies should consider the multifaceted nature of  
201 cognitive health and the diverse needs of aging populations in Bangladesh and beyond. By  
202 addressing these predictors and implementing targeted interventions, Government & NGO's can  
203 work towards improving cognitive function and quality of life for elderly individuals in  
204 community level at Bangladesh.

## 205 **Supporting information**

206 S1 Appendix. Informed consent form. The included written consent form administered to the  
207 participants.

208 S2 Appendix. Questionnaire. The included questions comprised the questionnaire administered  
209 to the participants.

210 S3 Appendix. The included data of the participants.

## 211 **Acknowledgement**

212 We would like to recognize the efforts of Sanjib Saha, Associate researcher, Lund University,  
213 Sweden who helped us through this study.

## 214 **Author contributions**

215 Conceptualization: Joynal Abedin Imran and Pradip Kumar Saha

216 Methodology: Joynal Abedin Imran;

217 Software: Joynal Abedin Imran

218 Validation: Pradip Kumar Saha

219 Formal Analysis: Joynal Abedin Imran

220 Investigation: Marzana Afrooj Ria and Syeda Saika Sarwar

221 Resources: Marzana Afrooj Ria and Jannatul Ferdous Konok

222 Data Curation: Syeda Saika Sarwar

223 Writing – Original Draft Preparation: Joynal Abedin Imran

224 Writing – Review & Editing: Joynal Abedin Imran, Marzana Afrooj Ria and Jannatul Ferdous  
225 Konok

226 Visualization: Joynal Abedin Imran and Pradip Kumar Saha

227 Supervision: Pradip Kumar Saha

228 Project Administration: Pradip Kumar Saha

229 **Funding**

230 No specific funding



## 231 References

- 232 1. Dumas JA. Strategies for Preventing Cognitive Decline in Healthy Older Adults. *Can J*  
233 *Psychiatry*. 2017 Nov 1;62(11):754–60. <https://doi.org/10.1177/0706743717720691>
- 234 2. Hossain S. Migration, urbanization and poverty in Dhaka, Bangladesh. *J Asiat Soc*  
235 *Bangladesh Hum*. 2013;58(2):369–82.
- 236 3. WHO. Dementia [Internet]. 2023 [cited 2024 May 30]. Available from:  
237 <https://www.who.int/news-room/fact-sheets/detail/dementia>
- 238 4. Hugo J, Ganguli M. Dementia and cognitive impairment: epidemiology, diagnosis, and  
239 treatment. *Clin Geriatr Med*. 2014;30(3):421–42.
- 240 5. WHO. Bangladesh WHO Special Initiative for Mental Health Situational Assessment  
241 [Internet]. 2020. Available from: [https://www.who.int/docs/default-source/mental-](https://www.who.int/docs/default-source/mental-health/special-initiative/who-special-initiative-country-report-%28brief%29---bangladesh---2020.pdf)  
242 [health/special-initiative/who-special-initiative-country-report-%28brief%29---](https://www.who.int/docs/default-source/mental-health/special-initiative/who-special-initiative-country-report-%28brief%29---bangladesh---2020.pdf)  
243 [bangladesh---2020.pdf](https://www.who.int/docs/default-source/mental-health/special-initiative/who-special-initiative-country-report-%28brief%29---bangladesh---2020.pdf)
- 244 6. Rahman MR, Tajmim A, Ali M, Sharif M. Overview and current status of Alzheimer’s  
245 disease in Bangladesh. *J Alzheimers Dis Rep*. 2017;1(1):27–42.
- 246 7. Nayan M, Miah M, KMS I. Prevalence of cognitive impairment and functional status  
247 among the stroke survivors in Bangladesh. *J Bangladesh J Occup Ther Rehabil*.  
248 2016;1(1):1–7.
- 249 8. NITOR. Patient Service – National Institute of Traumatology & Orthopaedic Rehabilitaion  
250 (NITOR) [Internet]. 2024 [cited 2024 Mar 19]. Available from:  
251 <https://nitor.gov.bd/patient-service/>
- 252 9. Basic D, Rowland JT, Conforti DA, Vratsidis F, Hill K, LoGiudice D, et al. The Validity of the  
253 Rowland Universal Dementia Assessment Scale (RUDAS) in a Multicultural Cohort of  
254 Community-dwelling Older Persons With Early Dementia. *Alzheimer Dis Assoc Disord*.  
255 2009 Jun;23(2):124. <https://doi.org/10.1097/WAD.0b013e31818ecc98>
- 256 10. Hossain Z, Das JK, Fahim NF, Ali H, Khondoker M. Prevalence and predictors of cognitive  
257 impairment among the elderly in Bangladesh. *J Public Health*. 2023 Apr 1;31(4):529–37.  
258 <https://doi.org/10.1007/s10389-021-01569-z>
- 259 11. Oishee IA, Tanira S, Shahrin T, Tamal SS, Jahan N, Moni MA. Cognitive Performance of the  
260 Elderly People in an Urban Area of Bangladesh: A Sociodemographic Study. *Community*  
261 *Based Med J*. 2024 Jan 24;13(1):9–16. <https://doi.org/10.3329/cbmj.v13i1.71066>
- 262 12. Uddin MdS, Mamun AA, Takeda S, Sarwar MdS, Begum MstM. Analyzing the chance of  
263 developing dementia among geriatric people: a cross-sectional pilot study in  
264 Bangladesh. *Psychogeriatrics*. 2019 Mar;19(2):87–94.  
265 <https://doi.org/10.1111/psyg.12368>

- 266 **13.** Beam CR, Kaneshiro C, Jang JY, Reynolds CA, Pedersen NL, Gatz M. Differences between  
267 women and men in incidence rates of dementia and Alzheimer’s disease. *J Alzheimers*  
268 *Dis.* 2018;64(4):1077–83.
- 269 **14.** Cheng HM, Chuang SY, Ko YT, Liao CF, Pan WH, Liu WL, et al. Education level may modify  
270 the association between cardiac index and cognitive function among elders with normal  
271 ejection function. *Front Cardiovasc Med.* 2022 Sep 12;9:844396.  
272 <https://doi.org/10.3389/fcvm.2022.844396>
- 273 **15.** Rodriguez FS, Hofbauer LM, Röhr S. The role of education and income for cognitive  
274 functioning in old age: A cross-country comparison. *Int J Geriatr Psychiatry.* 2021  
275 Dec;36(12):1908–21. <https://doi.org/10.1002/gps.5613>
- 276 **16.** Cano-López I, Aliño M, Duque A, Martínez P, Almela M, García-Rubio MJ, et al.  
277 Educational level as a protective factor against the influence of depressive symptoms on  
278 cognition in older adults: implications for functional independence during a 10-year  
279 follow-up. *Int Psychogeriatr.* 2021 Aug;33(8):813–25.  
280 <https://doi.org/10.1017/S1041610221000272>
- 281 **17.** Gupta D, Wilhalme H, Sauder G, Moin T. 142-LB: Cognitive Screening among Older Adults  
282 with Diabetes. *Diabetes.* 2022 Jun 1;71(Supplement\_1):142-LB.  
283 <https://doi.org/10.2337/db22-142-LB>
- 284 **18.** Jung CH, Mok JO. Cognitive Dysfunction and Diabetes. *J Korean Diabetes.* 2022 Sep  
285 30;23(3):165–77. <https://doi.org/10.4093/jkd.2022.23.3.165>
- 286 **19.** Muqit MM, Ferdous HS. Cognitive impairment in elderly, non-insulin dependent diabetic  
287 men in Bangladesh. *Bangladesh Med Res Counc Bull.* 1998 Aug;24(2):23–6.
- 288 **20.** Kaido M, Fukui M, Kawashima M, Negishi K, Tsubota K. Relationship between visual  
289 function and cognitive function in the elderly: A cross-sectional observational study.  
290 Chen F, editor. *PLOS ONE.* 2020 May 19;15(5):e0233381.  
291 <https://doi.org/10.1371/journal.pone.0233381>
- 292 **21.** Zheng DD, Swenor BK, Christ SL, West SK, Lam BL, Lee DJ. Longitudinal Associations  
293 Between Visual Impairment and Cognitive Functioning: The Salisbury Eye Evaluation  
294 Study. *JAMA Ophthalmol.* 2018 Sep 1;136(9):989.  
295 <https://doi.org/10.1001/jamaophthalmol.2018.2493>
- 296 **22.** Jonas JB, Wei WB, Zhu LP, Xu L, Wang YX. Cognitive Function and Ophthalmological  
297 Diseases: The Beijing Eye Study. *Sci Rep.* 2018 Mar 19;8(1):4816.  
298 <https://doi.org/10.1038/s41598-018-23314-5>
- 300

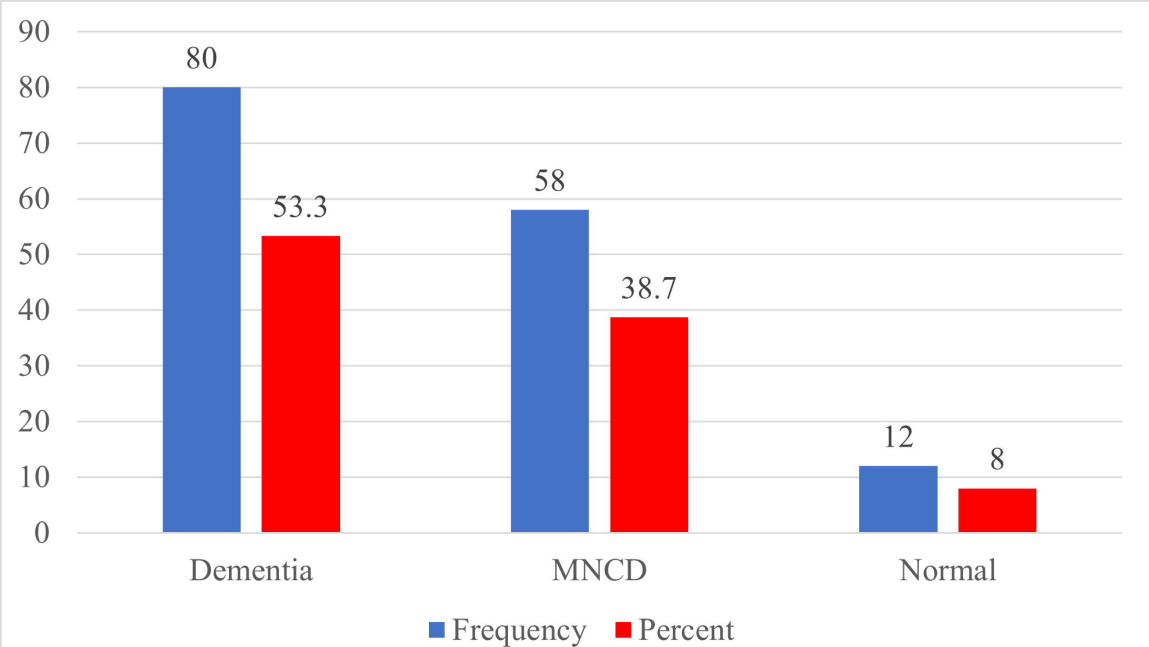

Source: https://medrxiv.org/content/10.1101/2024.08.22.24312384v1.full.pdf
